# Supplementary material
Source: PubMed Central journal article supplement (PMC5728990)
Supplement: NIHMS915208-supplement-supplement_1.pdf [file NIHMS915208-supplement-supplement_1.pdf]

Supplemental Table 1.

*A table of uncorrected correlations between mean amygdala activation during each condition (Affect Labeling, Gender Labeling, and Observing) and clinical variables (age of depression onset, number of previous depressive episodes, and current depressive episode length) at baseline.*

|                                        | Age of Depression<br>Onset<br>( <i>n</i> = 74) | Number of Previous<br>Depressive Episodes<br>( <i>n</i> = 74) | Current Depressive<br>Episode Duration<br>( <i>n</i> = 76) |
|----------------------------------------|------------------------------------------------|---------------------------------------------------------------|------------------------------------------------------------|
| Affect Labeling Amygdala<br>Activation | -0.287, <i>p</i> = .013                        | -0.024, <i>p</i> = .842                                       | -0.012, <i>p</i> = .918                                    |
| Gender Labeling<br>Amygdala Activation | -0.168, <i>p</i> = .154                        | .129, <i>p</i> = .273                                         | -0.173, <i>p</i> = .135                                    |
| Observing Amygdala<br>Activation       | -0.237, <i>p</i> = .042                        | -0.157, <i>p</i> = .181                                       | -0.134, <i>p</i> = .249                                    |
